# Supplementary material for: Exploring aerosol-cloud interactions over eastern China and its adjacent ocean using the WRF-SBM-MOSAIC model
Source: Copernicus journal article supplement (doi:10.5194/egusphere-2023-331), 2023-03-23
Supplement: Supplementary file 1 [file egusphere-2023-331-supplement.pdf]

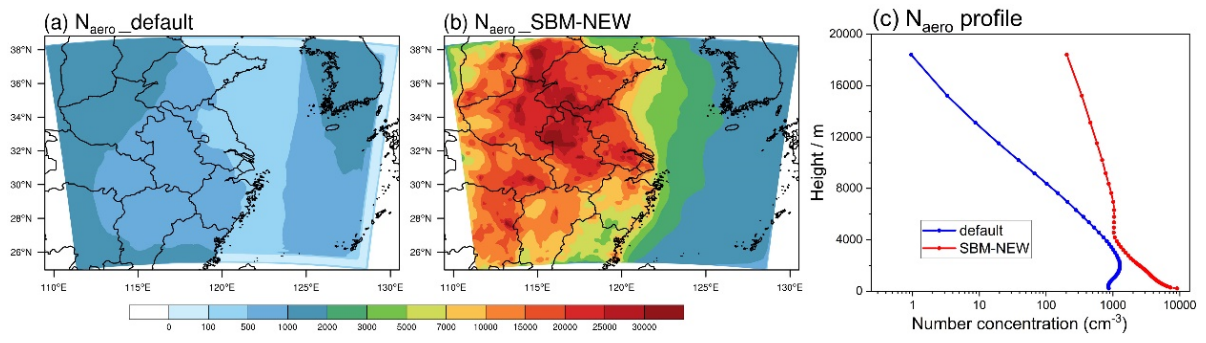

**Figure S1.** The (a) default and (b) SBM-NEW aerosol number concentration (unit:  $cm^{-3}$ ) spatial distribution (near surface) and (c) vertical profile
